# Supplementary material for: Modelling net energy of commercial cat diets
Source: PubMed Central journal article supplement (PMC6559639; doi:10.1371/journal.pone.0218173), 2019-06-11
Supplement: pone.0218173.s002.pdf [file pone.0218173.s002.pdf]

**Table 2.** Body weight and intake of energy for cats consuming 3 experimental diets

| Variable                                    | High PGR           | Med PGR            | Low PGR            | SEM <sup>1</sup> | <i>P</i> -value |
|---------------------------------------------|--------------------|--------------------|--------------------|------------------|-----------------|
| BW, (kg)                                    | 4.99               | 4.95               | 4.94               | 0.34             | 0.99            |
| Intake, (g/d)                               | 45.6 <sup>a</sup>  | 37.9 <sup>b</sup>  | 40.0 <sup>b</sup>  | 2.68             | 0.02            |
| Calculated ME <sup>2</sup> Intake, (kcal/d) | 155.8              | 154.5              | 154.3              | 10.08            | 0.98            |
| True ME Intake <sup>3</sup> , (kcal/d)      | 230.7 <sup>a</sup> | 173.9 <sup>b</sup> | 196.2 <sup>b</sup> | 12.71            | <0.001          |

<sup>a-c</sup>Within row, means without a common superscript differ ( $P < 0.05$ ).

<sup>1</sup>Means were based on 19 cat observations per diet.

<sup>2</sup>Calculated with modified Atwater equation (AAFCO, 1997): ME (kcal/kg) =  $[3.5 \times \text{CP} (\%) + 3.5 \times \text{NFE} (\%) + 8.5 \times \text{crude fat} (\%)] \times 10$ .

<sup>3</sup> Using analyzed ME from Asaro et al., 2017.
